# Supplementary figures and images for: In vitro evaluation of the biodegradability of chitosan–genipin hydrogels
Source: Royal Society of Chemistry journal article supplement (doi:10.1039/d2ma00536k), 2022-01-01

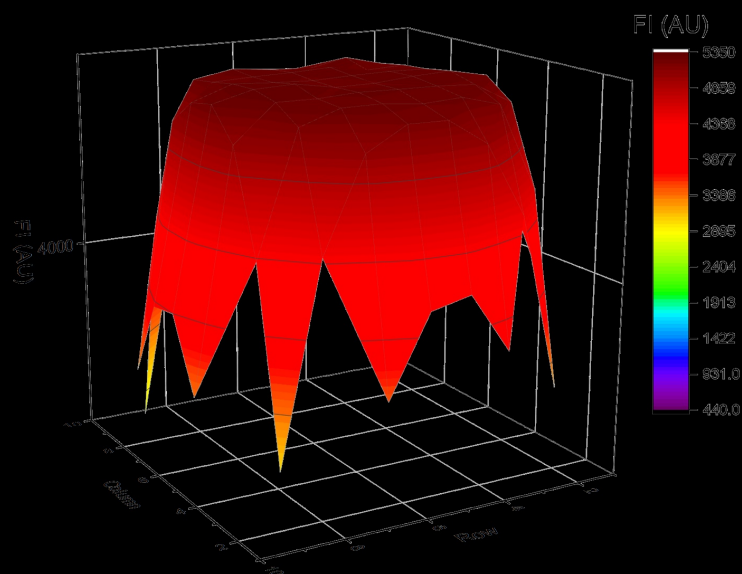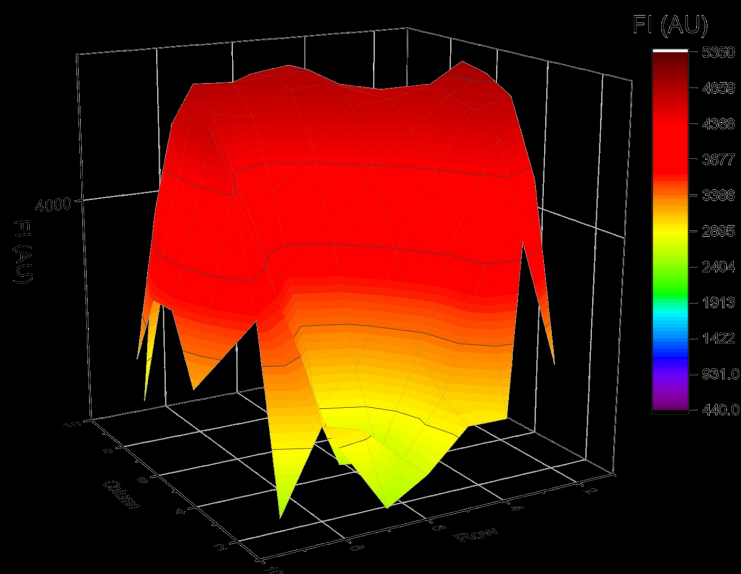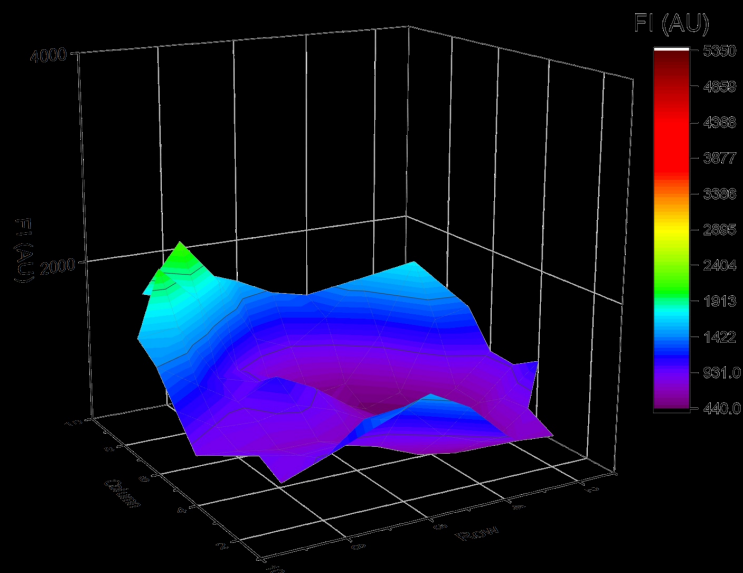

Supplement: d2ma00536k5.pdf [file d2ma00536k5.pdf]

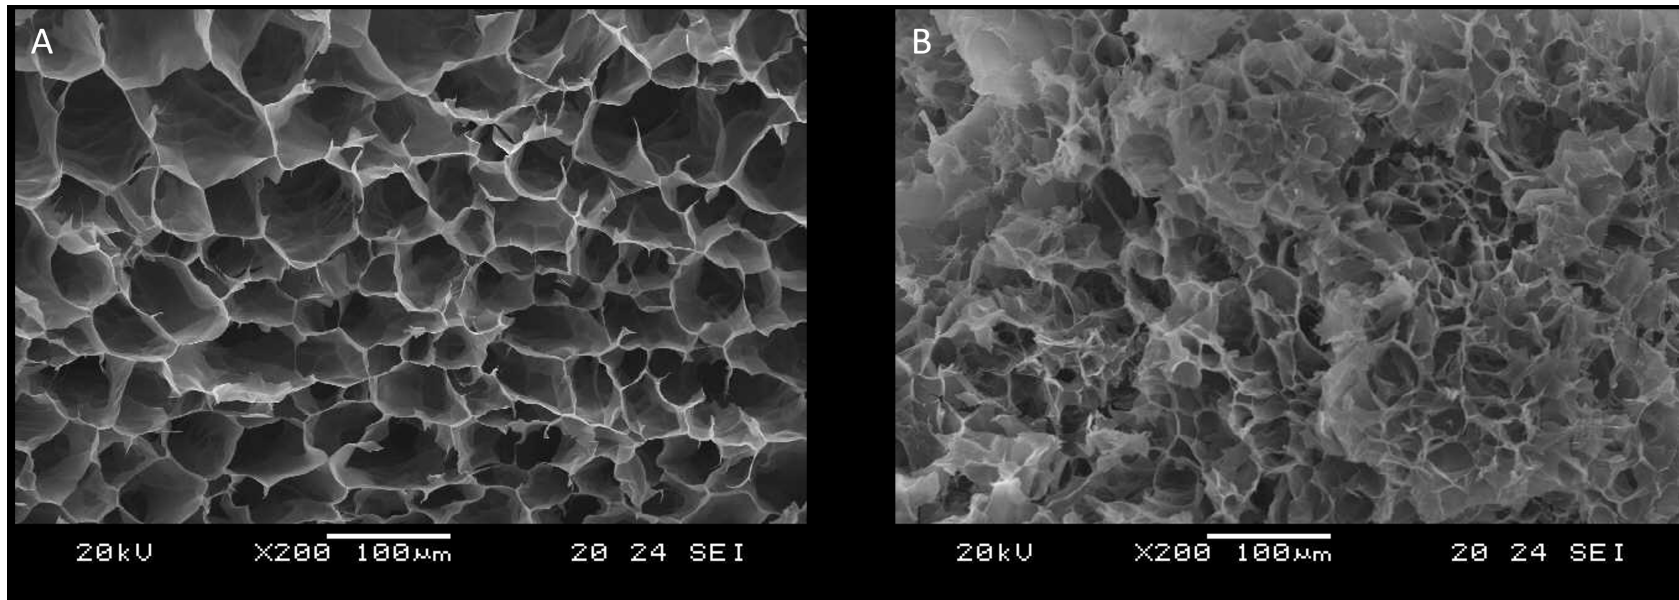

Supplement: d2ma00536k7.pdf [file d2ma00536k7.pdf]
